# Supplementary material
Source: HighWire-hosted journal article supplement (https://bmjopen.bmj.com/content/7/10/e017540)
Supplement: inline-supplementary-material-1 [file inline-supplementary-material-1.pdf]

Thank you for your participation in the MedApp-CHD Study. We seek your feedback about the smartphone apps so we can improve it in the future. All responses are strictly confidential.

|                                                                                                                          |                                      |
|--------------------------------------------------------------------------------------------------------------------------|--------------------------------------|
| <b>Today's Date:</b>                                                                                                     | Day _____ / Month _____ / Year _____ |
| <b>PART A – Medication knowledge</b>                                                                                     |                                      |
| <i>Please read each statement below and tick one option for each.</i>                                                    |                                      |
| <b>1) I can list the names of all my medications I am currently taking.</b>                                              |                                      |
| <input type="radio"/>                                                                                                    | <input type="radio"/>                |
| Strongly agree                                                                                                           | Agree                                |
| <input type="radio"/>                                                                                                    | <input type="radio"/>                |
| Neutral                                                                                                                  | Disagree                             |
| <input type="radio"/>                                                                                                    | <input type="radio"/>                |
| Strongly disagree                                                                                                        |                                      |
| <b>2) I can describe when to take all my prescribed medications.</b>                                                     |                                      |
| <input type="radio"/>                                                                                                    | <input type="radio"/>                |
| Strongly agree                                                                                                           | Agree                                |
| <input type="radio"/>                                                                                                    | <input type="radio"/>                |
| Neutral                                                                                                                  | Disagree                             |
| <input type="radio"/>                                                                                                    | <input type="radio"/>                |
| Strongly disagree                                                                                                        |                                      |
| <b>3) I can describe how to take all my prescribed medications.</b>                                                      |                                      |
| <input type="radio"/>                                                                                                    | <input type="radio"/>                |
| Strongly agree                                                                                                           | Agree                                |
| <input type="radio"/>                                                                                                    | <input type="radio"/>                |
| Neutral                                                                                                                  | Disagree                             |
| <input type="radio"/>                                                                                                    | <input type="radio"/>                |
| Strongly disagree                                                                                                        |                                      |
| <b>4) I confident I know what all my prescribed medications are for.</b>                                                 |                                      |
| <input type="radio"/>                                                                                                    | <input type="radio"/>                |
| Strongly agree                                                                                                           | Agree                                |
| <input type="radio"/>                                                                                                    | <input type="radio"/>                |
| Neutral                                                                                                                  | Disagree                             |
| <input type="radio"/>                                                                                                    | <input type="radio"/>                |
| Strongly disagree                                                                                                        |                                      |
| <b>PART B – Smartphone apps</b>                                                                                          |                                      |
| In the last 3 months, did you have access to Medisafe™ app or My heart my life™ app?                                     |                                      |
| <input type="radio"/> Yes → Go to <b>Part C</b>                                                                          |                                      |
| <input type="radio"/> No                                                                                                 |                                      |
| ↳ If no, did you use any other apps to help you take your medication? <input type="radio"/> Yes <input type="radio"/> No |                                      |
| <b>PART C – Feedback about the smartphone apps</b>                                                                       |                                      |
| <i>Please read each statement below and tick one option for each.</i>                                                    |                                      |
| <b>a) I found it useful to have my medication list on my smartphone</b>                                                  |                                      |
| <input type="radio"/>                                                                                                    | <input type="radio"/>                |
| Strongly agree                                                                                                           | Agree                                |
| <input type="radio"/>                                                                                                    | <input type="radio"/>                |
| Neutral                                                                                                                  | Disagree                             |
| <input type="radio"/>                                                                                                    | <input type="radio"/>                |
| Strongly disagree                                                                                                        |                                      |
| <b>b) I found it useful to set reminders to take my medication on the smartphone</b>                                     |                                      |
| <input type="radio"/>                                                                                                    | <input type="radio"/>                |
| Strongly agree                                                                                                           | Agree                                |
| <input type="radio"/>                                                                                                    | <input type="radio"/>                |
| Neutral                                                                                                                  | Disagree                             |
| <input type="radio"/>                                                                                                    | <input type="radio"/>                |
| Strongly disagree                                                                                                        |                                      |

**c) I found it useful to be able to track my measurements (e.g. blood pressure and sugar levels) in the smartphone app**

Strongly agree       Agree       Neutral       Disagree       Strongly disagree

**d) The reminders helped me remember to take my medicines every day in the correct time**

Strongly agree       Agree       Neutral       Disagree       Strongly disagree

**e) I found it easy to download the smartphone app**

Strongly agree       Agree       Neutral       Disagree       Strongly disagree

**f) I found it easy to use the smartphone app**

Strongly agree       Agree       Neutral       Disagree       Strongly disagree

**g) I found it easy to set up the reminders in the smartphone app**

Strongly agree       Agree       Neutral       Disagree       Strongly disagree

**h) I found it easy to track my measurements in the smartphone app**

Strongly agree       Agree       Neutral       Disagree       Strongly disagree

**i) I found it convenient to have this app on my smartphone**

Strongly agree       Agree       Neutral       Disagree       Strongly disagree

**j) How often did you set up the reminders?**

3 or more times per day       Twice a day       Once a day       Weekly/Not regularly       Never

**k) How often did you track your measurements in the smartphone app?**

Daily       2 or more times a week       Once a week       Less than weekly       Never

**l) How often did you have any technical issues with the smartphone app?**

Daily       Weekly       Monthly       Less than monthly       Never

**m) I will continue using the smartphone app**

Strongly agree       Agree       Neutral       Disagree       Strongly disagree

**n) I would recommend the smartphone app to family and friends**  
Strongly agree  
Agree  
Neutral  
Disagree  
Strongly disagree**Additional comments**

*Please provide any further comments or suggestions about the smartphone app.*

---

---

---

---

---

---

---

---

---

---

**PART D – Additional features of the Medisafe™ app**

Did you have access to the Medisafe™ app?

- Yes → Go to Part E  
 No → Finished.

**PART E – Feedback about the additional features***Please read each statement below and tick one option for each.***o) I found it useful to be able to snooze the reminder**

- Strongly agree       Agree       Neutral       Disagree       Strongly disagree

**p) I found it useful to track my taken and missed doses**

- Strongly agree       Agree       Neutral       Disagree       Strongly disagree

**q) I found it useful to be able to share my medication history with my family and health professionals**

- Strongly agree       Agree       Neutral       Disagree       Strongly disagree

**r) I found it useful have additional information about my medication in the smartphone app**

- Strongly agree       Agree       Neutral       Disagree       Strongly disagree

**Additional comments***Please provide any further comments or suggestions about the smartphone app.*

---

---

---

---

---

---

---

---

---

---
